# Supplementary material
Source: publisher figshare collection journal article supplement (https://gsajournals.figshare.com/articles/dataset/_/6853244)
Supplement: Supplementary file 1 [file 1]

## Sheet: Table S1
Supplementary Table 1. Oryza accessions included in the SureSelect and phenotyping panel in this study
Lab ID	SureSelect ID	Seed Source ID	Seed Source	Group	Subgroup	Country of origin	Pericarp	Rc (SureSelect)	Rc (CAPS)	Hull	Bh4 (CAPS)	Shattering (g)	Sh4	Days to flowering (day)	Days to flowering (category)	Tiller angle	PROG1 (haplotype)	Seed length/width	Sdr4
arr01	arr01	IRGC_103832	IRRI	South Asian weedy rice	admixed	Bangladesh	Red	Rc	In	Straw	14-bp Del	20.29	T	113.5	100-120	30-60	ref	3.30838	NA
arr02	arr02	IRGC_105869	IRRI	South Asian weedy rice	aus-like	Bangladesh	Red	Rc	In	Black	No Del	NA	T	NA		NA	ref	NA	NA
arr05	arr05	IRGC_106228	IRRI	South Asian weedy rice	admixed	India	Red	Rc	In	Black	No Del	7.36	T	119	100-120	30-60	ref	3.35169	NA
arr19	arr19	IRGC_105311	IRRI	South Asian weedy rice	wild-like	India	Red	Rc	In	Black	No Del	0	G	138.67	>120	30-60	ref	4.89097	Sdr4-n
arr20	arr20	IRGC_106120	IRRI	South Asian weedy rice	aus-like	India	Red	Rc	In	Black	No Del	NA	T	NA		NA	ref	NA	NA
arr21	arr21	IRGC_80626	IRRI	South Asian weedy rice	aus-like	India	Red	Rc	In	Black	No Del	9.42	T	126	>120	30-60	ref	3.92728	NA
arr23	arr23	IRGC_93189	IRRI	South Asian weedy rice	wild-like	Nepal	Red	Rc	In	Straw	No Del	11.61	G	94	<100	<30	nonref	3.9047	NA
arr24	arr24	IRGC_93293	IRRI	South Asian weedy rice	aus-like	Nepal	Red	Rc	In	Black	No Del	0	T	174.67	>120	<30	ref	3.96325	Sdr4-n
arr25	arr25	IRGC_93307	IRRI	South Asian weedy rice	aus-like	Nepal	Red	Rc	In	Black	No Del	3.02	T	111.33	100-120	30-60	ref	3.49546	NA
arr26	arr26	IRGC_83256	IRRI	South Asian weedy rice	admixed	Pakistan	Red	Rc	In	Straw	14-bp Del	25.57	T	85	<100	<30	ref	3.51858	Sdr4-n
arr27	arr27	IRGC_103790	IRRI	South Asian weedy rice	admixed	Sri Lanka	White	rc	Del	Black	No Del	0.17	T	119.5	100-120	<30	ref	3.75083	NA
arr28	arr28	IRGC_103791	IRRI	South Asian weedy rice	admixed	Sri Lanka	Red	Rc	NA	Black	NA	NA	T	NA		NA	nonref	NA	NA
arr29	arr29	IRGC_74723	IRRI	South Asian weedy rice	indica-like	India	White	rc	Del	Straw	14-bp Del	42.83	T	120.33	>120	<30	ref	3.71829	Sdr4-n
arr33	arr33	IRGC_80568	IRRI	South Asian weedy rice	aus-like	India	Red	Rc	NA	Black	NA	0	G	113	100-120	30-60	nonref	4.38386	NA
arr35	arr35	IRGC_80614	IRRI	South Asian weedy rice	aus-like	India	Red	Rc	In	Black	NA	1.23	T	121	>120	<30	ref	3.99843	Sdr4-n
arr37	arr37	IRGC_80741	IRRI	South Asian weedy rice	admixed	Myanmar	Red	Rc	In	Black	14-bp Del	NA	T	232	>120	30-60	nonref	NA	NA
arr44	arr44	IRGC_81929	IRRI	South Asian weedy rice	wild-like	India	Red	Rc	In	Black	NA	23.22	G	80.67	<100	<30	nonref	4.15181	NA
arr48	arr48	IRGC_93178	IRRI	South Asian weedy rice	aus-like	Bangladesh	Red	Rc	In	Straw	No Del	NA	T	NA		NA	ref	NA	NA
arr51	arr51	IRGC_93297	IRRI	South Asian weedy rice	aus-like	Nepal	Red	Rc	In	Black	No Del	NA	T	NA		NA	ref	NA	Sdr4-k
arr52	arr52	IRGC_93302	IRRI	South Asian weedy rice	aus-like	Nepal	Red	Rc	In	Black	No Del	0.33	T	133	>120	30-60	ref	3.48709	NA
arr53	arr53	IRGC_93303	IRRI	South Asian weedy rice	aus-like	Nepal	Red	Rc	In	Straw	14-bp Del	NA	T	NA		NA	ref	NA	NA
arr57	arr57	IRGC_93320	IRRI	South Asian weedy rice	indica-like	Nepal	Red	Rc	In	Straw	14-bp Del	17.6	T	117.67	100-120	NA	ref	3.20102	NA
arr58	arr58	IRGC_100200	IRRI	South Asian weedy rice	indica-like	Myanmar	White	rc	Del	Straw	14-bp Del	6.92	T	108.33	100-120	30-60	nonref	3.79561	NA
arr60	arr60	IRGC_100915	IRRI	South Asian weedy rice	indica-like	India	Red	rc	Del	Straw	14-bp Del	0	K	149	>120	<30	ref	3.85093	Sdr4-n
arr62	arr62	IRGC_103826	IRRI	South Asian weedy rice	aus-like	Bangladesh	Red	Rc	In	Straw	No Del	1.63	T	144.5	>120	<30	ref	2.98409	NA
arr63	arr63	IRGC_103829	IRRI	South Asian weedy rice	aus-like	Bangladesh	Red	Rc	NA	Black	NA	NA	T	NA		NA	ref	NA	Sdr4-k
arr64	arr64	IRGC_103833	IRRI	South Asian weedy rice	admixed	Bangladesh	Red	Rc	NA	Straw	NA	NA	T	NA		NA	ref	NA	NA
arr65	arr65	IRGC_103834	IRRI	South Asian weedy rice	aus-like	Bangladesh	Red	Rc	In	Black	No Del	0	T	128	>120	<30	ref	4.25518	NA
arr68	arr68	IRGC_105337	IRRI	South Asian weedy rice	wild-like	India	Red	Rc	In	Black	No Del	7.54	G	91	<100	30-60	ref	4.3073	NA
arr71	arr71	IRGC_105351	IRRI	South Asian weedy rice	wild-like	India	Red	Rc	In	Black	No Del	0	G	143	>120	30-60	ref	4.66735	NA
arr74	arr74	IRGC_105877	IRRI	South Asian weedy rice	indica-like	Bangladesh	Red	Rc	In	Straw	No Del	16.45	T	98	<100	30-60	ref	2.92028	NA
arr76	arr76	IRGC_105892	IRRI	South Asian weedy rice	aus-like	Bangladesh	Red	Rc	In	Black	No Del	NA	T	NA		NA	ref	NA	NA
arr78	arr78	IRGC_106030	IRRI	South Asian weedy rice	admixed	Bangladesh	Red	Rc	NA	Black	No Del	NA	K	128	>120	<30	ref	NA	NA
arr79	arr79	IRGC_106043	IRRI	South Asian weedy rice	admixed	India	Red	Rc	In	Black	No Del	NA	T	NA		NA	ref	NA	NA
arr82	arr82	IRGC_106401	IRRI	South Asian weedy rice	admixed	Myanmar	White	rc	Del	Black	14-bp Del	NA	G	214	>120	30-60	ref	NA	NA
obr01	207	IRGC_104081	IRRI	Outgroup	Outgroup	Nigeria	Red	Rc	NA	Black	NA	NA	G	NA		NA	nonref	NA	NA
obr03	208	IRGC_104119	IRRI	Outgroup	Outgroup	Chad	Red	Rc	NA	Black	NA	NA	G	NA		NA	nonref	NA	NA
omd01	206	IRGC_101148	IRRI	Outgroup	Outgroup	India	Red	Rc	NA	Black	NA	NA	G	NA		NA	nonref	NA	NA
omd2	omd2	IRGC_93261	IRRI	Outgroup	Outgroup	Indonesia	Red	Rc	NA	Black	NA	NA	G	NA		NA	nonref	NA	NA
onv03	245	IRGC_105706	IRRI	South Asian wild rice	South Asian wild rice	Nepal	Red	Rc	In	Black	No Del	0	G	72.67	<100	<30	nonref	4.51937	NA
onv04	239	IRGC_80470	IRRI	South Asian wild rice	South Asian wild rice	India	Red	Rc	NA	Black	No Del	0	G	115	100-120	60-90	nonref	4.54352	NA
onv09	243	IRGC_103830	IRRI	South Asian wild rice	South Asian wild rice	Bangladesh	Red	Rc	In	Black	No Del	0	T	130	>120	30-60	nonref	4.48069	NA
onv13	onv13	IRGC_80759	IRRI	South Asian wild rice	South Asian wild rice	Myanmar	Red	Rc	In	Black	NA	NA	G	NA		NA	nonref	NA	NA
onv14	onv14	IRGC_81941	IRRI	South Asian wild rice	South Asian wild rice	Myanmar	Red	Rc	NA	Straw	No Del	9.05	G	101	100-120	60-90	nonref	4.74653	NA
or03	249	IRGC_106122	IRRI	South Asian wild rice	South Asian wild rice	India	Red	Rc	In	Black	No Del	NA	G	188	>120	60-90	nonref	NA	Sdr4-n
or07	244	IRGC_104599	IRRI	South Asian wild rice	South Asian wild rice	Sri Lanka	Red	Rc	NA	Black	NA	0	G	214	>120	60-90	nonrf	6.21053	NA
or18	246	IRGC_105888	IRRI	South Asian wild rice	South Asian wild rice	Bangladesh	Red	Rc	In	Black	No Del	NA	G	NA		NA	nonref	NA	NA
or20	248	IRGC_106103	IRRI	South Asian wild rice	South Asian wild rice	India	Red	Rc	In	Black	No Del	NA	G	NA		NA	nonref	NA	NA
or21	250	IRGC_106134	IRRI	South Asian wild rice	South Asian wild rice	India	Red	Rc	NA	Black	NA	NA	G	NA		NA	nonref	NA	NA
or29	241	IRGC_81990	IRRI	South Asian wild rice	South Asian wild rice	Myanmar	Red	Rc	NA	Black	NA	NA	G	NA		NA	nonref	NA	NA
or32	or32	IRGC_93214	IRRI	South Asian wild rice	South Asian wild rice	Nepal	Red	Rc	In	Black	NA	NA	G	NA		NA	nonref	NA	NA
or33	or33	IRGC_93215	IRRI	South Asian wild rice	South Asian wild rice	Nepal	Red	Rc	In	Black	NA	NA	G	NA		NA	nonref	NA	NA
or35	or35	IRGC_93217	IRRI	South Asian wild rice	South Asian wild rice	Nepal	Red	Rc	In	Straw	No Del	NA	G	NA		NA	nonref	NA	Sdr4-n
or44	or44	IRGC_93219	IRRI	South Asian wild rice	South Asian wild rice	Nepal	White	rc	Del	Straw	No Del	NA	T	NA		NA	ref	NA	NA
or46	247	IRGC_105898	IRRI	South Asian wild rice	South Asian wild rice	Bangladesh	Red	Rc	NA	Black	NA	NA	G	NA		NA	nonref	NA	NA
or62	240	IRGC_81883	IRRI	South Asian wild rice	South Asian wild rice	India	Red	Rc	NA	Black	NA	NA	G	NA		NA	nonref	NA	Sdr4-n
or67	242	IRGC_103423	IRRI	South Asian wild rice	South Asian wild rice	Sri Lanka	Red	Rc	NA	Straw	NA	NA	T	NA		NA	ref	NA	Sdr4-n
sar02	sar02	IRGC_12880	IRRI	japonica	aromatic	Iran	White	rc	Del	Straw	14-bp Del	NA	T	NA		NA	nonref	NA	Sdr4-n
sar03	sar03	IRGC_5857	IRRI	japonica	aromatic	Bangladesh	White	rc	Del	Straw	14-bp Del	NA	T	NA		NA	nonref	NA	Sdr4-n
sar34	sar34	GSOR_301011	USDA-ARS	japonica	aromatic	Pakistan	White	rc	Del	Straw	14-bp Del	NA	T	NA		NA	nonref	NA	Sdr4-n
sau01	sau01	USDA-NPGS HO1195*	USDA-ARS	aus	aus	India	Red	Rc	In	Straw	No Del	NA	T	NA		NA	nonref	NA	NA
sau07	sau07	IRGC_29016	IRRI	aus	aus	Bangladesh	Red	Rc	In	Straw	NA	NA	T	NA		NA	nonref	NA	NA
sau43	sau43	GSOR_312017	USDA-ARS	aus	aus	India	White	Rc-s	In	Straw	NA	12.97	T	105.67	100-120	30-60	nonref	4.07996	Sdr4-n
sau50	sau50	GSOR_301144	USDA-ARS	aus	aus	India	NA	Rc	In	NA	14-bp Del	32.07	K	119.5	100-120	<30	nonref	4.02164	NA
sau53	sau53	GSOR_301201	USDA-ARS	aus	aus	Sri Lanka	White	Rc	In	Straw	14-bp Del	NA	T	NA		NA	nonref	NA	Sdr4-n
sau54	sau54	GSOR_301251	USDA-ARS	aus	aus	Iraq	Red	Rc-s	In	Straw	14-bp Del	8.59	T	121	>120	30-60	nonref	3.98178	Sdr4-n
sau55	sau55	GSOR_301252	USDA-ARS	aus	aus	Iraq	White	Rc-s	In	Straw	No Del	54.9	T	135	>120	<30	nonref	3.26001	NA
sau57	sau57	GSOR_301304	USDA-ARS	aus	aus	Bangladesh	White	Rc-s	In	Straw	14-bp Del	NA	T	NA		NA	nonref	NA	Sdr4-n
sau63	sau63	GSOR_301312	USDA-ARS	aus	aus	Bangladesh	White	Rc-s	In	Straw	14-bp Del	NA	T	NA		NA	nonref	NA	Sdr4-n
sau64	sau64	GSOR_301313	USDA-ARS	aus	aus	Bangladesh	White	Rc-s	In	Straw	NA	NA	T	NA		NA	nonref	NA	NA
sau66	sau66	GSOR_301316	USDA-ARS	aus	aus	Bangladesh	White	rc	Del	Straw	14-bp Del	NA	T	NA		NA	nonref	NA	NA
sau67	sau67	GSOR_301317	USDA-ARS	aus	aus	Bangladesh	Red	Rc	In	Black	No Del	13.16	T	134.5	>120	<30	nonref	3.13333	NA
sau71	sau71	GSOR_301331	USDA-ARS	aus	aus	Afghanistan	White	Rc-s	In	Straw	14-bp Del	30.09	T	129	>120	30-60	nonref	3.66682	Sdr4-n
sau73	sau73	GSOR_301336	USDA-ARS	aus	aus	Bangladesh	White	Rc-s	In	Straw	14-bp Del	NA	T	NA		NA	nonref	NA	Sdr4-n
sau75	sau75	GSOR_301345	USDA-ARS	admixed cultivar	admixed cultivar	India	Red	Rc	In	Straw	NA	NA	T	NA		NA	nonref	NA	Sdr4-n
sau79	sau79	GSOR_301359	USDA-ARS	admixed cultivar	admixed cultivar	Pakistan	White	Rc	In	Straw	14-bp Del	32.84	G	121	>120	<30	nonref	4.15239	NA
sau80	sau80	GSOR_301363	USDA-ARS	aus	aus	Sri Lanka	Red	Rc	NA	Black	NA	19	T	121.5	>120	NA	nonref	4.22349	Sdr4-n
sau81	sau81	IRGC_32399	IRRI	japonica	japonica	Bhutan	Red	rc	NA	Black	NA	NA	T	NA		NA	nonref	NA	Sdr4-n
sin03	sin03	IRGC_46202	IRRI	indica	indica	India	White	rc	Del	Straw	14-bp Del	NA	T	NA		NA	ref	NA	NA
sin04	sin04	IRGC_27513	IRRI	indica	indica	Bangladesh	White	rc	Del	Straw	No Del	NA	T	NA		NA	ref	NA	Sdr4-k'
sin09	sin09	USDA (PI 279131)	USDA-ARS	indica	indica	Taiwan	White	rc	Del	Straw	14-bp Del	NA	T	NA		NA	ref	NA	Sdr4-n
sin11	sin11	GSOR_301069	USDA-ARS	indica	indica	India	White	rc	Del	Straw	14-bp Del	39.79	T	124	>120	30-60	nonref	3.67453	NA
sin15	sin15	GSOR_301274	USDA-ARS	indica	indica	Nepal	White	rc	Del	Straw	14-bp Del	36.21	T	92	<100	<30	nonref	4.43932	Sdr4-k'
sin16	sin16	GSOR_301288	USDA-ARS	indica	indica	Sri Lanka	Red	Rc	NA	Straw	NA	NA	T	110	100-120	<30	nonref	NA	NA
sin18	sin18	GSOR_301305	USDA-ARS	indica	indica	Myanmar	Red	Rc	In	Straw	14-bp Del	36.04	T	106	100-120	<30	nonref	3.72497	Sdr4-n
sin19	sin19	GSOR_301315	USDA-ARS	indica	indica	Myanmar	White	rc	Del	Straw	14-bp Del	34.79	T	128	>120	<30	nonref	3.20394	Sdr4-n
sin22	sin22	GSOR_301342	USDA-ARS	indica	indica	India	White	rc	Del	Straw	NA	NA	T	NA		NA	nonref	NA	Sdr4-n
sin24	sin24	GSOR_301382	USDA-ARS	indica	indica	Bangladesh	White	rc	Del	Straw	No Del	NA	T	NA		NA	nonref	NA	NA
sin25	sin25	GSOR_312012	USDA-ARS	indica	indica	India	White	rc	Del	Straw	14-bp Del	NA	T	NA		NA	nonref	NA	Sdr4-n
sin26	sin26	GSOR_312016	USDA-ARS	admixed cultivar	admixed cultivar	Bangladesh	Red	Rc	In	Straw	No Del	NA	T	NA		NA	nonref	NA	NA
sin27	sin27	IRGC_16163	IRRI	japonica	japonica	Nepal	White	Rc	In	Straw	No Del	27.29	T	109.33	100-120	<30	ref	4.51748	Sdr4-n
sin33	sin33	IRGC_61923	IRRI	japonica	japonica	Nepal	White	rc	NA	Straw	14-bp Del	23.99	T	118	100-120	30-60	ref	3.40339	Sdr4-n
sin39	sin39	IRGC_109364	IRRI	admixed cultivar	admixed cultivar	Nepal	Red	Rc	In	Black	14-bp Del	NA	T	NA		NA	ref	NA	Sdr4-n
sin41	sin41	IRGC_110311	IRRI	admixed cultivar	admixed cultivar	Nepal	White	rc	Del	Straw	NA	NA	T	NA		NA	nonref	NA	Sdr4-n
sin42	sin42	IRGC_6663	IRRI	indica	indica	India	Red	Rc	NA	Black	NA	29.89	T	97.33	<100	<30	ref	4.04833	Sdr4-k
sin43	sin43	IRGC_45011	IRRI	indica	indica	India/Bangladesh	White	rc	Del	Straw	No Del	NA	T	NA		NA	ref	NA	NA
ste07	ste07	GSOR_301328	USDA-ARS	japonica	japonica	Myanmar	White	rc	Del	Straw	14-bp Del	NA	T	NA		NA	ref	NA	Sdr4-n
ste08	ste08	GSOR_301343	USDA-ARS	japonica	japonica	India	White	rc	Del	Straw	No Del	NA	T	NA		NA	ref	NA	Sdr4-n
ste09	ste09	IRGC_33888	IRRI	japonica	japonica	Myanmar	White	rc	NA	Straw	14-bp Del	NA	T	NA		NA	ref	NA	Sdr4-n
ste10	ste10	IRGC_58286	IRRI	japonica	japonica	Afghanistan	White	rc	NA	Straw	14-bp Del	NA	T	NA		NA	ref	NA	Sdr4-n
str04	str04	IRGC_25901	IRRI	japonica	japonica	Bangladesh	White	rc	Del	Straw	14-bp Del	NA	T	NA		NA	ref	NA	Sdr4-n

## Sheet: Table S2 
Supplementary Table 2: 128 mapped genes/regions obtained from SureSelect target sequencing
MSU6_ID	Candidate gene or distance to candidate gene	Chromosome	Mapped length	Start	Stop
LOC_Os01g20900.5	10690249	1	1235	11676457	11684281
LOC_Os01g38480.3	748808	1	1452	21622530	21625722
LOC_Os01g38980.2	472266	1	1778	21899000	21902264
LOC_Os01g39310.3	246848	1	1846	22119272	22127682
LOC_Os01g39670.1	SaF	1	1986	22374530	22376515
LOC_Os01g39680.2	SaM	1	2517	22378014	22382004
LOC_Os01g40110.1	242157	1	1903	22624161	22627013
LOC_Os01g40570.1	525132	1	1906	22907136	22909643
LOC_Os01g40870.1	730597	1	1828	23112601	23118671
LOC_Os02g10794.1	714906	2	1902	5727688	5732172
LOC_Os02g11110.1	489776	2	1425	5955000	5957302
LOC_Os02g11130.1	479410	2	1264	5966029	5967668
LOC_Os02g11700.1	428223	2	1246	6017155	6018855
LOC_Os02g11940.1	253446	2	1778	6188722	6193632
LOC_Os02g12350.1	16458	2	4483	6424555	6430620
LOC_Os02g12380.1	Hd1	2	4292	6447078	6453173
LOC_Os02g12790.1	252431	2	1928	6705604	6707734
LOC_Os02g13110.2	510786	2	1857	6963959	6971934
LOC_Os02g13510.1	767165	2	1965	7220338	7224509
LOC_Os02g22440.1	4823174	2	335	13406647	13406982
LOC_Os02g29450.1	747519	2	462	17482176	17482637
LOC_Os02g29890.1	450476	2	1644	17775171	17779680
LOC_Os02g30240.1	253490	2	1033	17975634	17976666
LOC_Os02g30624.2	225	2	1407	18225256	18229931
LOC_Os02g30630.1	ALS	2	2352	18230156	18232507
LOC_Os02g30974.1	262827	2	1823	18495334	18503763
LOC_Os02g31220.1	467010	2	1266	18699517	18706535
LOC_Os02g31230.1	475710	2	1287	18708217	18712077
LOC_Os02g32060.1	697941	2	1854	18930448	18933648
LOC_Os02g33110.1	1444168	2	1950	19676675	19681382
LOC_Os02g33680.1	1843784	2	967	20076291	20077808
LOC_Os02g35670.1	3206660	2	464	21439167	21439843
LOC_Os02g56000.1	16027588	2	1359	34260095	34264066
LOC_Os03g28330.1	NA	3	1337	16299924	16306279
LOC_Os03g63300.1	NA	3	1175	35765491	35770329
LOC_Os04g02980.1	19035639	4	1237	1205047	1214576
LOC_Os04g15580.1	11778800	4	1039	8468098	8471415
LOC_Os04g31960.1	1278107	4	1289	18970119	18972108
LOC_Os04g32010.1	1250866	4	1489	18997165	18999349
LOC_Os04g32650.1	739994	4	2145	19505074	19510221
LOC_Os04g32960.1	492277	4	2107	19748825	19757938
LOC_Os04g33310.1	276646	4	1331	19972061	19973569
LOC_Os04g33720.1	6929	4	1494	20240359	20243286
LOC_Os04g33740.1	GIF1	4	4886	20250215	20255106
LOC_Os04g34140.1	263791	4	1723	20518897	20520669
LOC_Os04g34580.1	497153	4	1092	20752259	20753350
LOC_Os04g36810.1	742638	4	1966	22038604	22042099
LOC_Os04g37790.2	500840	4	2055	22281254	22283897
LOC_Os04g38220.1	221765	4	1810	22559067	22562972
LOC_Os04g38660.1	Bh4	4	1120	22784737	22785856
LOC_Os04g38670.1	832	4	517	22786688	22787204
LOC_Os04g39080.1	255179	4	1638	23041035	23043127
LOC_Os04g39420.1	492356	4	1753	23278212	23280588
LOC_Os04g39814.3	744444	4	1092	23530300	23536588
LOC_Os04g39840.1	756921	4	1306	23542777	23548804
LOC_Os04g39880.1	776526	4	1029	23562382	23567624
LOC_Os04g39900.1	791323	4	1166	23577179	23583102
LOC_Os04g47860.5	3333111	4	1028	28223519	28230884
LOC_Os04g52164.2	749515	4	2118	30810218	30814480
LOC_Os04g52420.1	594418	4	1811	30961872	30969577
LOC_Os04g52540.1	505672	4	1606	31054075	31058323
LOC_Os04g52550.1	499429	4	1804	31059338	31064566
LOC_Os04g52890.1	246327	4	1990	31312153	31317668
LOC_Os04g53260.1	19755	4	1261	31542662	31544240
LOC_Os04g53290.1	7654	4	636	31555706	31556341
LOC_Os04g53300.1	Phr1	4	3152	31563995	31567166
LOC_Os04g53700.1	250447	4	1748	31817613	31822220
LOC_Os04g54010.1	441619	4	1500	32008785	32011495
LOC_Os04g54020.1	445318	4	1953	32012484	32017613
LOC_Os04g54080.1	476801	4	1011	32043967	32048532
LOC_Os04g54110.1	486101	4	1122	32053267	32057421
LOC_Os04g54120.1	492604	4	1714	32059770	32063071
LOC_Os04g54630.1	728843	4	661	32296009	32296669
LOC_Os04g56170.1	738322	4	2001	33303396	33307760
LOC_Os04g56560.1	498695	4	1674	33544692	33547387
LOC_Os04g57010.1	244938	4	1786	33797846	33801144
LOC_Os04g57530.1	sh4	4	2188	34046082	34048269
LOC_Os04g57760.1	166660	4	1611	34214929	34216539
LOC_Os04g58380.1	500218	4	1920	34548487	34550984
LOC_Os04g58810.1	747221	4	1586	34795490	34797092
LOC_Os06g05400.1	500314	6	1623	2436788	2438691
LOC_Os06g05870.2	251450	6	1991	2677431	2687555
LOC_Os06g06300.1	11530	6	1357	2925824	2927475
LOC_Os06g06320.1	HD3a	6	2423	2939005	2941453
LOC_Os06g06780.1	253119	6	1917	3194572	3198008
LOC_Os06g07190.2	497652	6	1764	3439105	3442077
LOC_Os06g07630.1	747220	6	1766	3688673	3693343
LOC_Os06g09050.1	757158	6	1421	4555488	4557021
LOC_Os06g09120.1	724091	6	2277	4586790	4590088
LOC_Os06g09450.3	510932	6	2048	4795287	4803247
LOC_Os06g09930.1	250151	6	1785	5059661	5064028
LOC_Os06g10330.1	7431	6	184	5306467	5306748
LOC_Os06g10350.1	OsC1	6	1594	5314179	5315876
LOC_Os06g10670.1	253035	6	1439	5568911	5570472
LOC_Os06g11010.1	S5	6	1770	5758686	5760519
LOC_Os06g11400.1	245926	6	1812	6006445	6009098
LOC_Os06g11800.1	489199	6	1733	6249718	6252709
LOC_Os06g12170.4	753921	6	1932	6514440	6518200
LOC_Os06g36770.1	15893381	6	1164	21653900	21661474
LOC_Os06g38470.1	17032807	6	1885	22793326	22799224
LOC_Os06g51280.1	25288286	6	587	31048805	31049630
LOC_Os07g04440.1	873135	7	839	1964294	1965342
LOC_Os07g04700.2	747823	7	1775	2083110	2090654
LOC_Os07g05190.1	520467	7	1897	2312397	2318010
LOC_Os07g05550.1	240416	7	1658	2594720	2598061
LOC_Os07g05900.1	PROG1	7	504	2838477	2838980
LOC_Os07g06470.1	287724	7	1816	3126704	3129758
LOC_Os07g06840.1	502171	7	1447	3341151	3342597
LOC_Os07g07230.2	743193	7	1965	3582173	3587395
LOC_Os07g09580.1	727713	7	1780	5070072	5076622
LOC_Os07g10350.1	248182	7	2189	5550586	5556153
LOC_Os07g10690.3	OsCPL1	7	6608	5804335	5810942
LOC_Os07g10700.1	256	7	1017	5811198	5812918
LOC_Os07g10730.1	10893	7	972	5821835	5823008
LOC_Os07g11020.1	Rc	7	6403	6061890	6068318
LOC_Os07g12200.1	753726	7	1478	6822044	6824446
LOC_Os07g38830.1	499806	7	2103	23292338	23295811
LOC_Os07g39310.1	252535	7	1769	23539714	23543082
LOC_Os07g39700.1	Sdr4	7	1023	23795617	23796648
LOC_Os07g40120.1	273539	7	1772	24070187	24072541
LOC_Os07g40550.3	494918	7	2008	24291566	24297869
LOC_Os07g40690.1	586766	7	1122	24383414	24385712
LOC_Os07g41070.1	769490	7	1783	24566138	24569324
LOC_Os07g42490.1	1631997	7	1131	25428645	25434188
LOC_Os08g08140.1	NA	8	1093	4630723	4637682
LOC_Os08g09230.2	NA	8	1557	5351108	5362370
LOC_Os11g32650.1	NA	11	1322	18811245	18814704
LOC_Os12g34854.1	NA	12	1043	21182866	21185532
Candidate genes targeted in this study
Flanking gene regions

## Sheet: Table S3
Supplementary Table 3. Hull color phenotype and Bh4 gene variation in Oryza accessions
Group	Hull color
	Black		Straw
Cultivars (33)	22-bp Del	No Del	22-bp Del	No Del
aus (10)	0	1	7	2
indica (10)	0	0	7	3
japonica (10)	0	0	8	2
admixed cutivar (3)	1	0	1	1
South Asian weedy rice (29)
aus-like (12)	0	9	1	2
indica-lke (5)	0	0	4	1
wild-like (4)	0	3	0	1
admixed (8)	2	4	2	0
South Asian wild rice (10)	0	7	0	3

## Sheet: Table S4
Supplementary Table 4. Shattering phenotype and Sh4 functional polymorphism in Oryza accessions
Group	Strong shattering (0g)			Medium shattering (<20g)			No shattering (>=20g)
Cultivars (15)	T	K*	G	T	K	G	T	K	G
aus (7)	0	0	0	4	0	0	2	1	0
indica (5)	0	0	0	0	0	0	5	0	0
japonica (2)	0	0	0	0	0	0	2	0	0
admixed cutivar (1)	0	0	0	0	0	0	0	0	1
South Asian weedy rice (22)
aus-like (9)	2	0	1	6	0	0	0	0	0
indica-lke (5)	0	1	0	3	0	0	1	0	0
wild-like (5)	0	0	2	0	0	2	0	0	1
admixed (3)	0	0	0	1	0	0	2	0	0
South Asian wild rice (5)	1	0	3	0	0	1	0	0	0
* K is the ambiguity code representing the nucleotide of G or T.

## Sheet: Table S5
Supplementary Table 5. Changes in nucleotide diversity between weed groups and ancestors
Locus	Summary statistics	aus-like weed/aus	indica-like weed/indica	wild-like weed/wild
Rc	π (silent)	0.806716	1.55125	0.502401
	θw (silent)	0.619958	1.18614	0.30574
Bh4	π (silent)	0.870536	1.04	0.0906291
	θw (silent)	1	1.48954	0.117966
Sh4	π (silent)	2.52	NA	1.56092
	θw (silent)	9	NA	0.999085
PROG1	π (silent)	NA	7.80767	1.02106
	θw (silent)	NA	4.47302	0.661081
Sdr4	π (silent)	0.999042	1.62704	0.969528
	θw (silent)	2.99713	1.49141	0.550995
All 128 genes	π (silent)	1.06482	1.21756	0.691257
	θw (silent)	1.09431	1.14577	0.572229
Ancestor >2X more diverse than weed group
Weed group >2X more diverse than ancestor group
